# Supplementary material for: Polypropylene fabric coated with branched polyethyleneimine derivatives for high antiviral activity
Source: Royal Society of Chemistry journal article supplement (doi:10.1039/d4lf00142g), 2024-01-01
Supplement: d4lf00142g1.pdf [file d4lf00142g1.pdf]

## Supporting information

### **Polypropylene fabric coated with branched polyethyleneimine derivatives for high antiviral activity**

**Lori Leblond<sup>1</sup>, Abdessadk Anagri<sup>1</sup>, Jacques Fiset<sup>1</sup>, Marie-Yolande Borget<sup>2</sup>, Philippe  
Bébin<sup>1</sup>, Nancy Dumais<sup>2</sup>, Pascal Y. Vuillaume<sup>1,\*</sup>**

#### **\*Corresponding Author**

<sup>1</sup> **Pascal Yves Vuillaume** - COALIA, Thetford Mines, Quebec, G6G 1N1, Canada;

orcid.org/my-orcid?orcid=0000-0001-5779-9253; Email: [pvuillaume@coalia.ca](mailto:pvuillaume@coalia.ca)

#### **Authors**

<sup>1</sup> **Lori Leblond** - COALIA, Thetford Mines, Quebec, G6G 1N1, Canada

<sup>1</sup> **Abdessadk Anagri** - COALIA, Thetford Mines, Quebec, G6G 1N1, Canada

<sup>1</sup> **Jacques Fiset** - COALIA, Thetford Mines, Quebec, G6G 1N1, Canada

<sup>2</sup> **Marie-Yolande Borget** - Department. of Biology, University of Sherbrooke, Sherbrooke,  
Quebec, J1K 2R1, Canada

<sup>1</sup> **Philippe Bébin** - COALIA, Thetford Mines, Quebec, G6G 1N1, Canada

<sup>2</sup> **Nancy Dumais** - Department. of Biology, University of Sherbrooke, Sherbrooke, Quebec,  
J1K 2R1, Canada

**Table S1.** FTIR bands assignment

| Wavenumber (cm <sup>-1</sup> ) | Functional Group                                              | References   |
|--------------------------------|---------------------------------------------------------------|--------------|
| $\nu(\text{N-H})$              |                                                               |              |
| 3400-3250                      | Aliphatic Primary Amine – 2 bands<br>Secondary Amine – 1 band | [35, 36]     |
| 2955                           | $\nu(\text{CH}_3)$ asym.                                      | [10, 35]     |
| 2934                           | $\nu(\text{CH}_2)$ asym.                                      | [10, 35]     |
| 2925                           | $\nu(\text{CH}_2)$ asym.                                      | [10, 35]     |
| 2858                           | $\nu(\text{CH}_2)$ sym.                                       | [10, 35]     |
| 2815                           | $\nu(\text{CH}_2)$ sym.                                       | [10, 35]     |
| 1591                           | $\delta_s(\text{NH}_2, \text{NH})$                            | [35, 36]     |
| 1475-1450                      | $\delta_s(\text{CH}_2)$                                       | [35, 36]     |
| 1470-1430                      | $\delta(\text{CH}_3)$ asym.                                   | [35, 36]     |
| 1378                           | $\delta(\text{CH}_3)$ sym.                                    | [35, 36]     |
| 1350-1000                      | $\nu(\text{C-N})$                                             | [17, 35, 36] |
| 720                            | $\rho(\text{C}-(\text{CH}_2)_n-\text{C } n \geq 4)$           | [35]         |

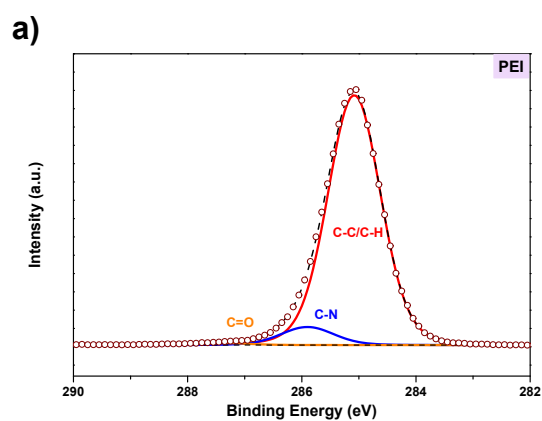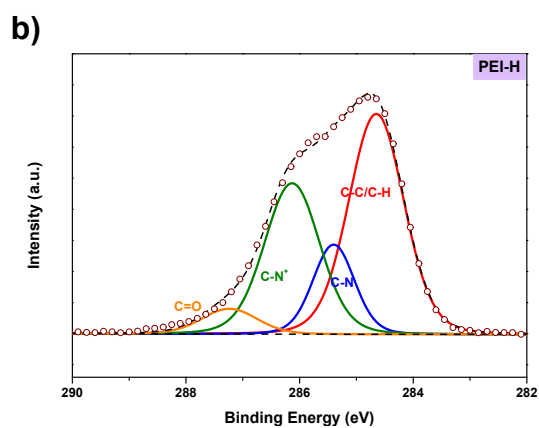

c)

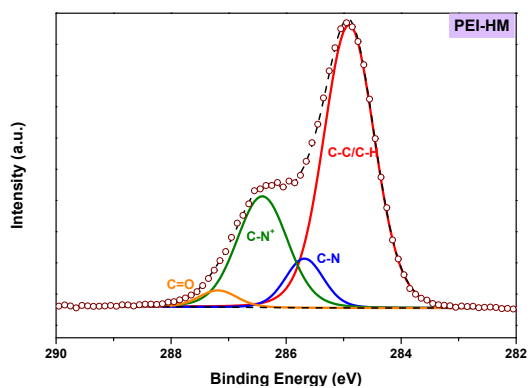

**Figure S1.** XPS high-resolution spectra of a), b), and c) C1s of PEI, and alkylated PEI derivatives.

**Branched PEI-750 kDa**

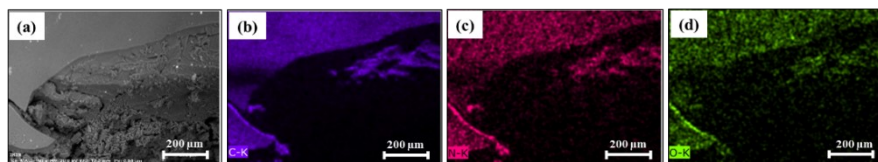

**PEI-H**

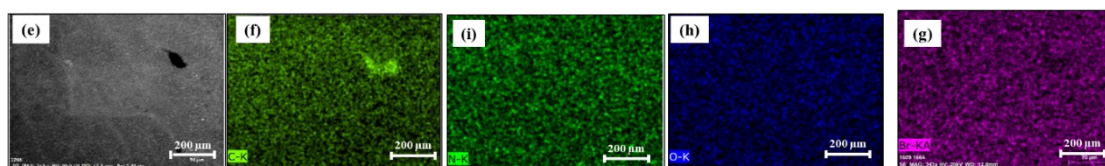

**PEI-HM**

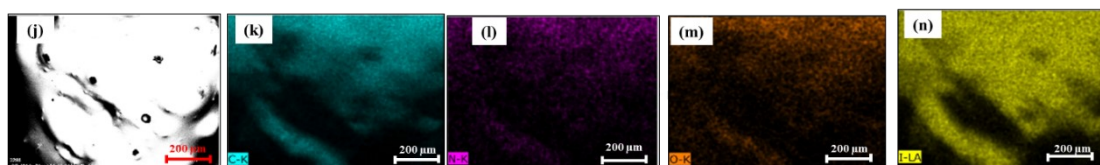

**Figure S2.** SEM-EDS images and elemental mapping of PEI and alkylated PEI derivatives.

**Table S2.** Elemental composition obtained from XPS analysis for PEI, PEI-H, and PEI-HM

| Polymers | Elemental composition (at. %) |      |     |     |     |
|----------|-------------------------------|------|-----|-----|-----|
|          | C                             | N    | O   | Br  | I   |
| PEI      | 71.3                          | 28.3 | 0.3 | -   | -   |
| PEI-H    | 77.7                          | 12.0 | 1.4 | 8.4 | -   |
| PEI-HM   | 85.6                          | 8.4  | 1.5 | -   | 4.5 |

**Table S3.** Reduced viral titer of FCV after 4 hours incubation with PP felt coated with PEI, PEI-H, and PEI-HM at different concentrations.

| <b>Concentration (<math>\mu\text{mol N/cm}^2</math>)</b> | <b>Reduction in viability (Log (PFU/mL))</b> |              |               |
|----------------------------------------------------------|----------------------------------------------|--------------|---------------|
|                                                          | <b>PEI</b>                                   | <b>PEI-H</b> | <b>PEI-HM</b> |
| 0.0001                                                   | 6                                            | 6            | 4             |
| 0.001                                                    | 6                                            | 6            | 4             |
| 0.01                                                     | 6                                            | 6            | 4             |
| 0.1                                                      | -                                            | -            | 3             |
| 1                                                        | -                                            | -            | 1             |
